# Supplementary material for: Anthocyanins from Hibiscus syriacus L. Inhibit NLRP3 Inflammasome in BV2 Microglia Cells by Alleviating NF‐κB‐ and ER Stress‐Induced Ca2+ Accumulation and Mitochondrial ROS Production
Source: Hindawi journal article supplement (doi:10.1155/2021/1246491), 2021-01-01
Supplement: f1 [file 1246491.f1.pdf]

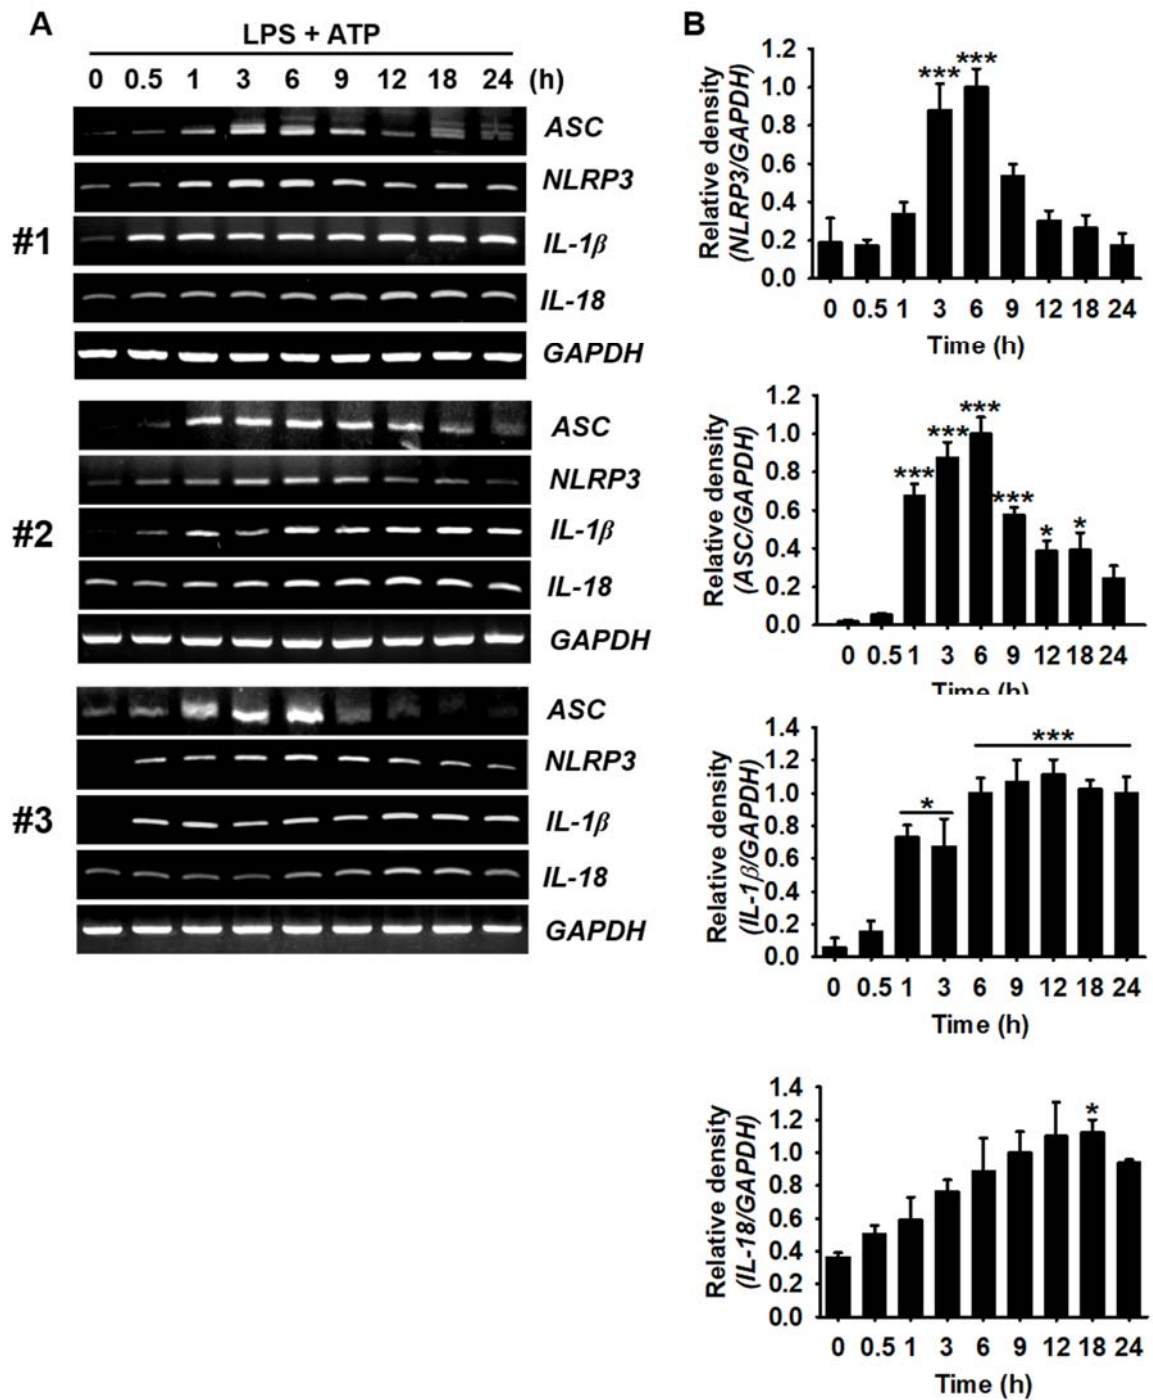

Supplementary Figure S1: Triplicate data (A) and densitometric analysis (B) of Figure 2A.

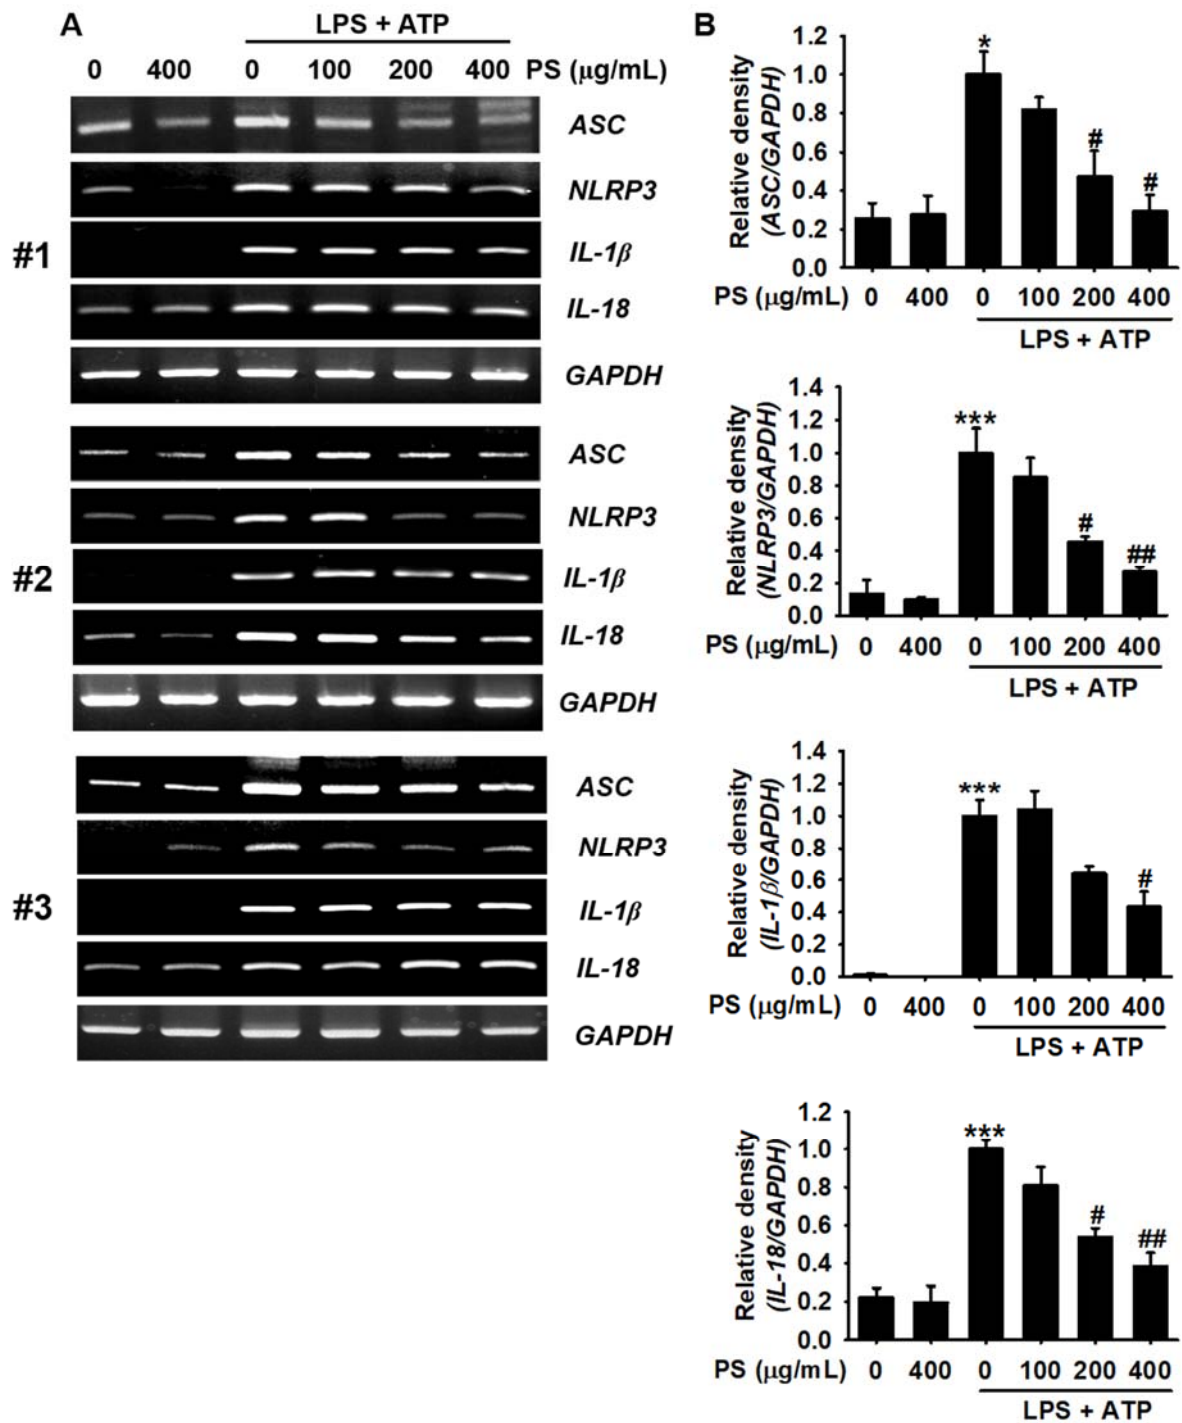

Supplementary Figure S2: Triplicate data (A) and densitometric analysis (B) of Figure 2B.

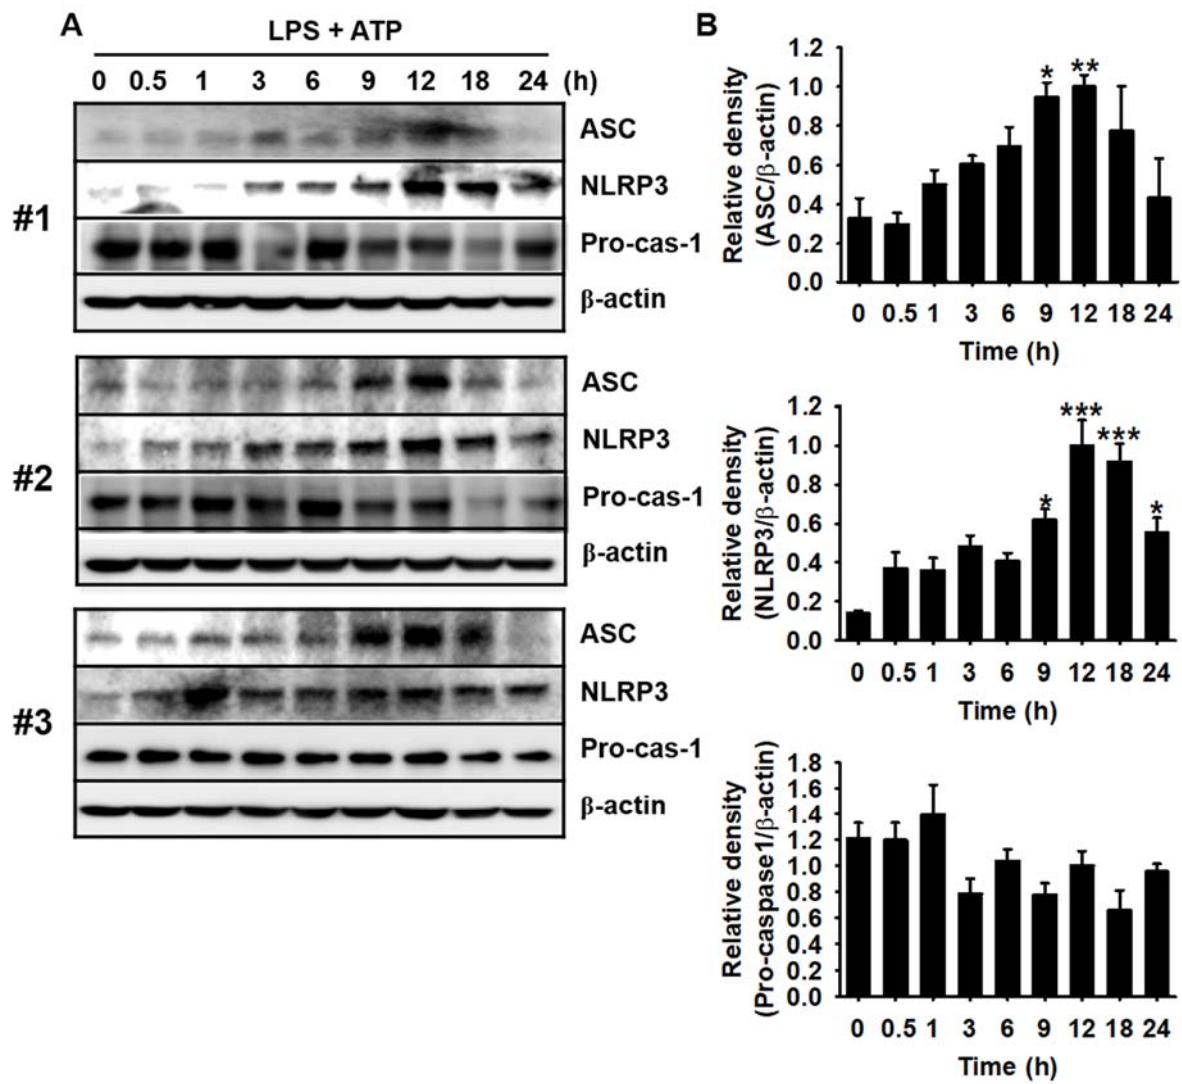

Supplementary Figure S3: Triplicate data (A) and densitometric analysis (B) of Figure 2C.

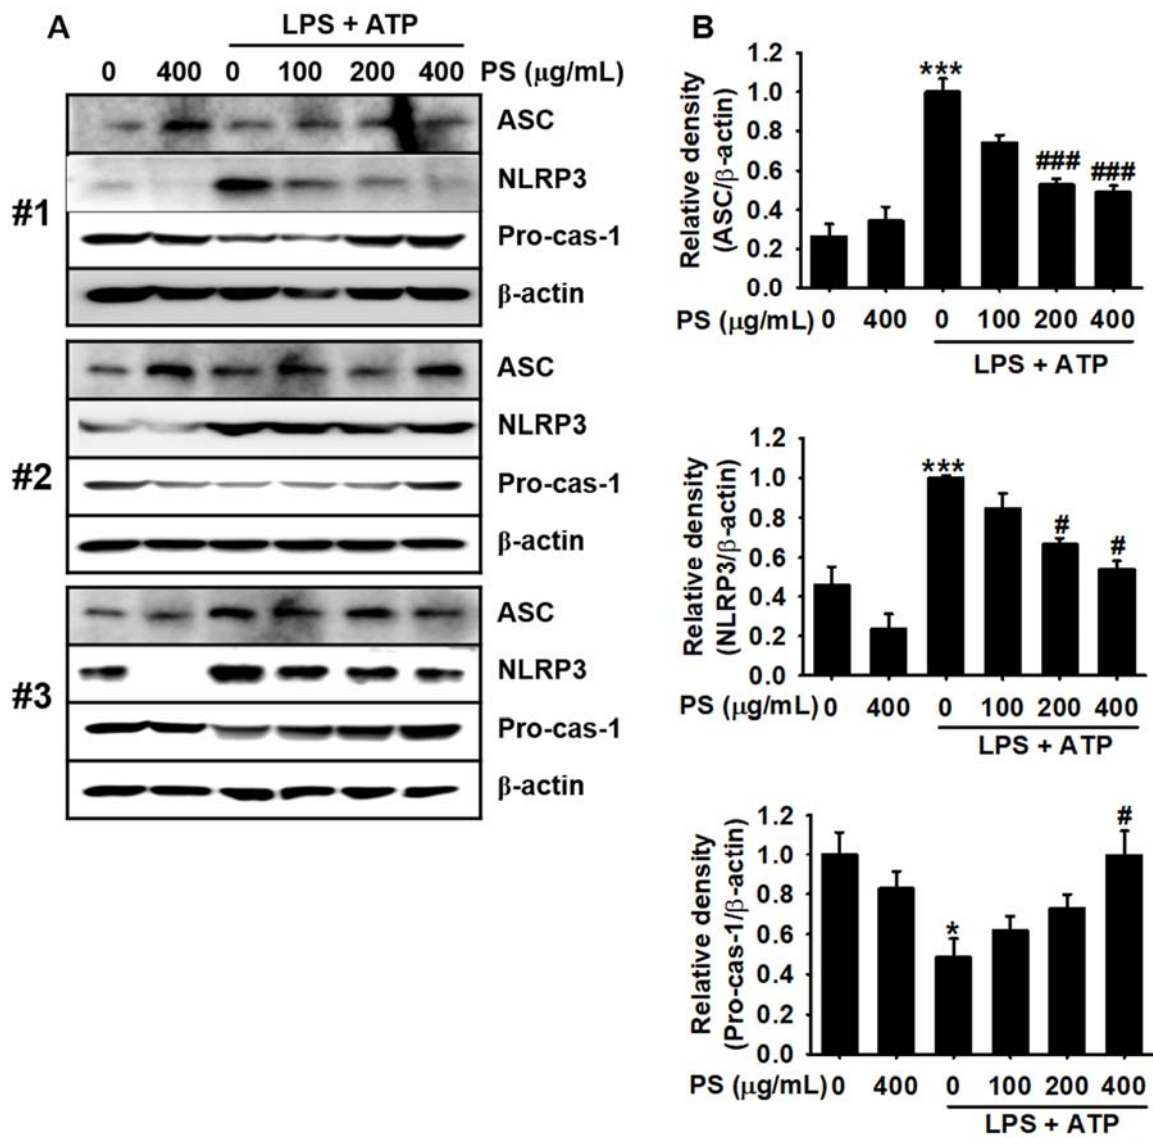

Supplementary Figure S4: Triplicate data (A) and densitometric analysis (B) of Figure 2D.

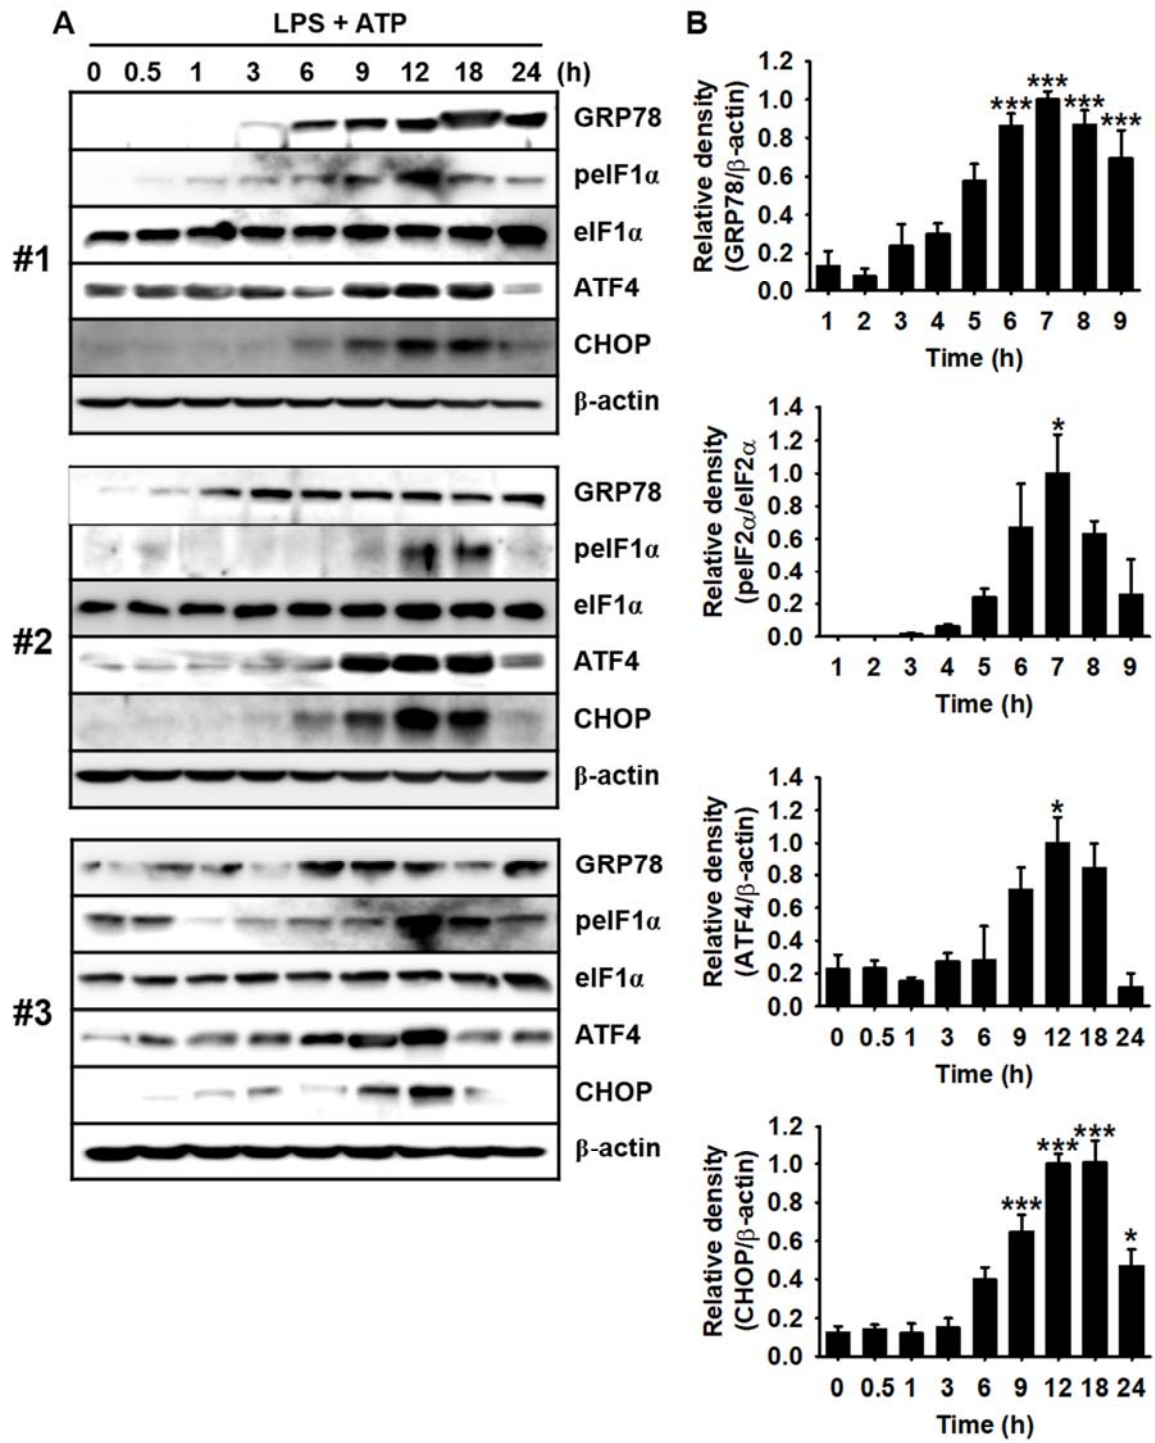

Supplementary Figure S5: Triplicate data (A) and densitometric analysis (B) of Figure 3A.



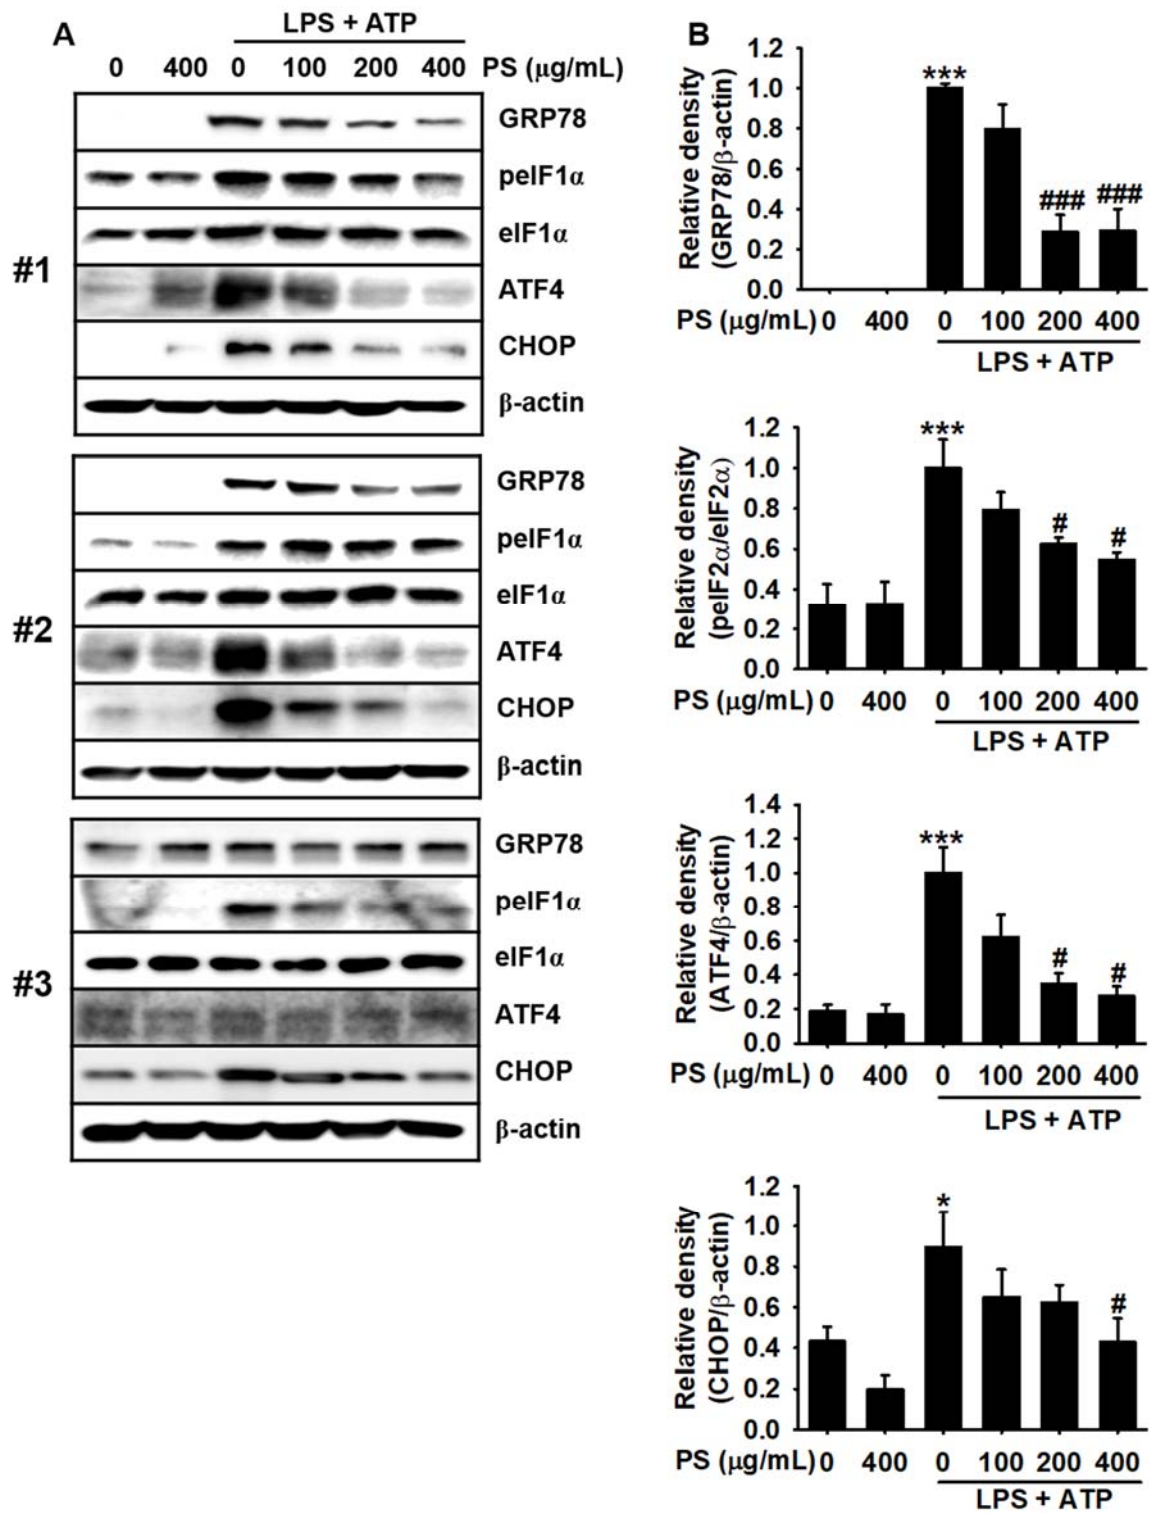

Supplementary Figure S6: Triplicate data (A) and densitometric analysis (B) of Figure 3B.

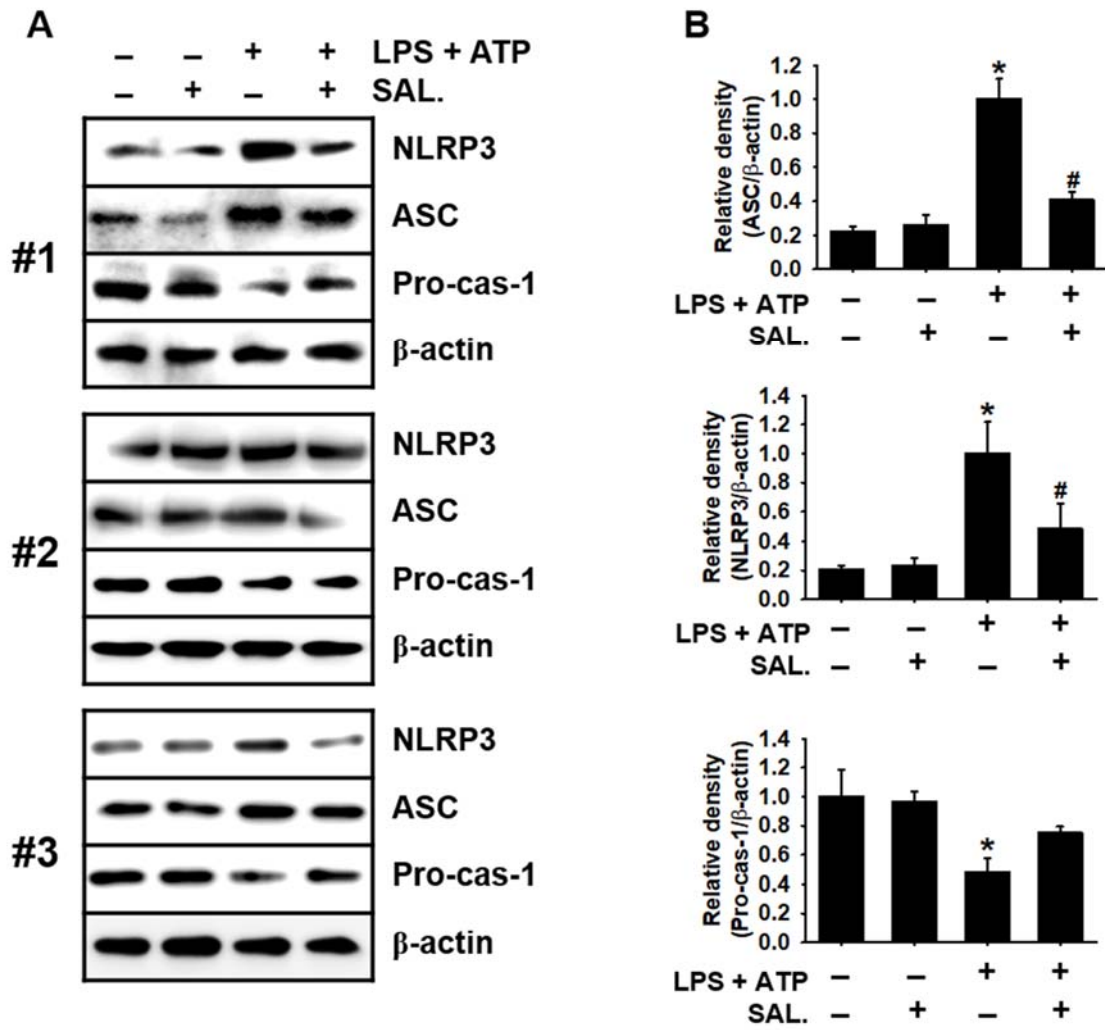

Supplementary Figure S7: Triplicate data (A) and densitometric analysis (B) of Figure 3E.

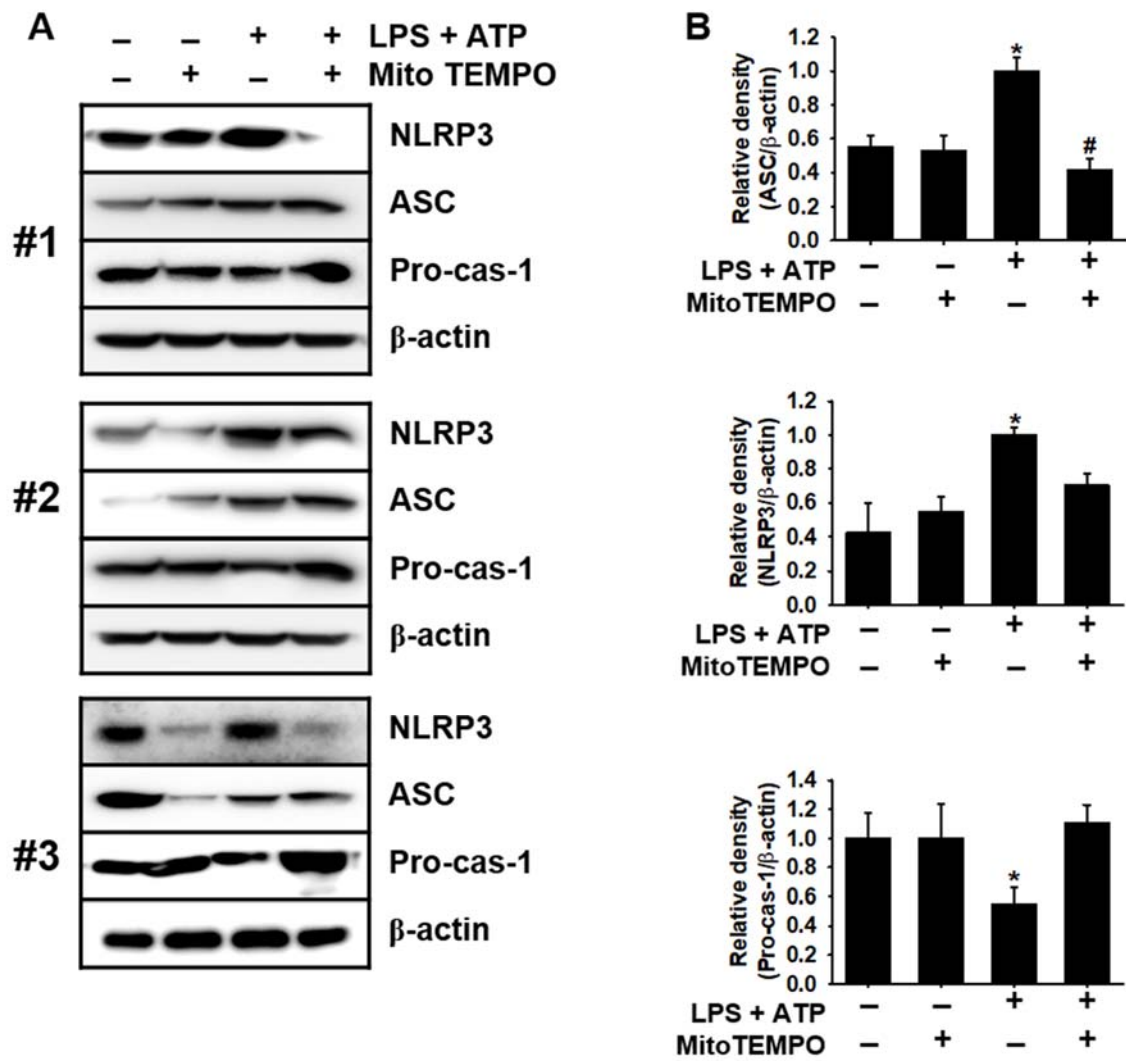

Supplementary Figure S8: Triplicate data (A) and densitometric analysis (B) of Figure 4C.



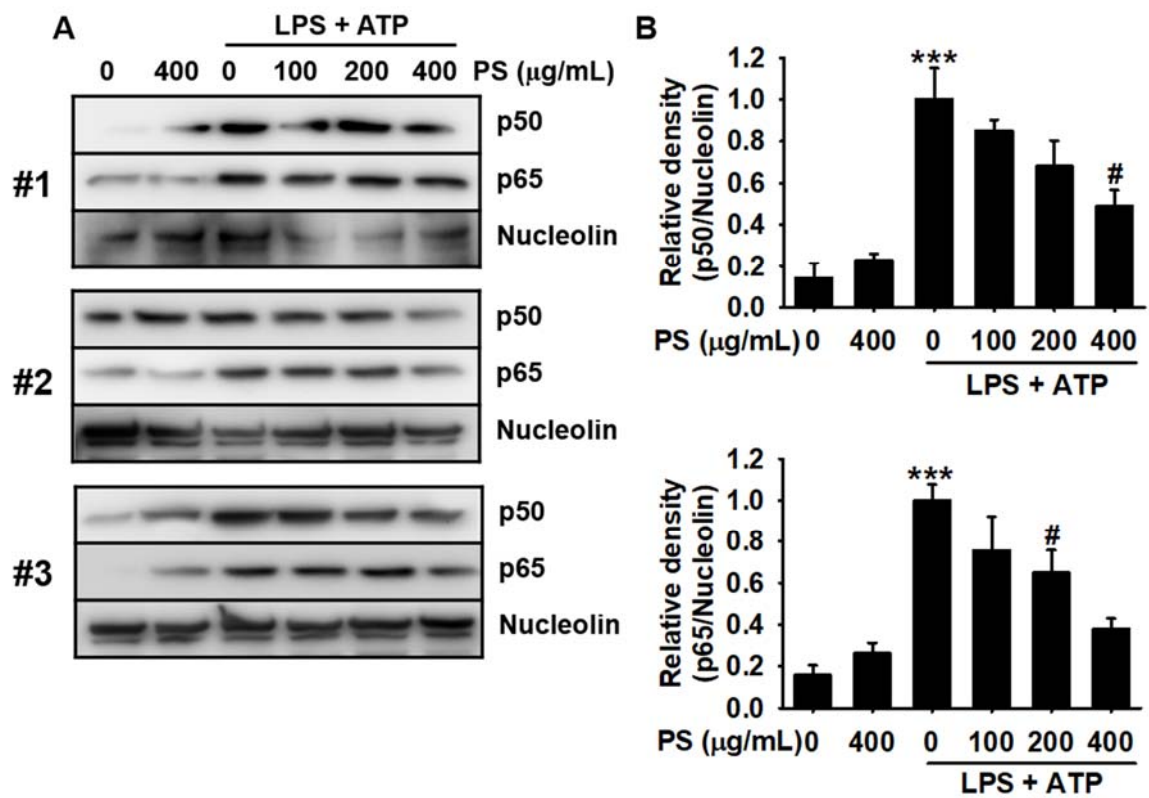

Supplementary Figure S9: Triplicate data (A) and densitometric analysis (B) of Figure 7A.

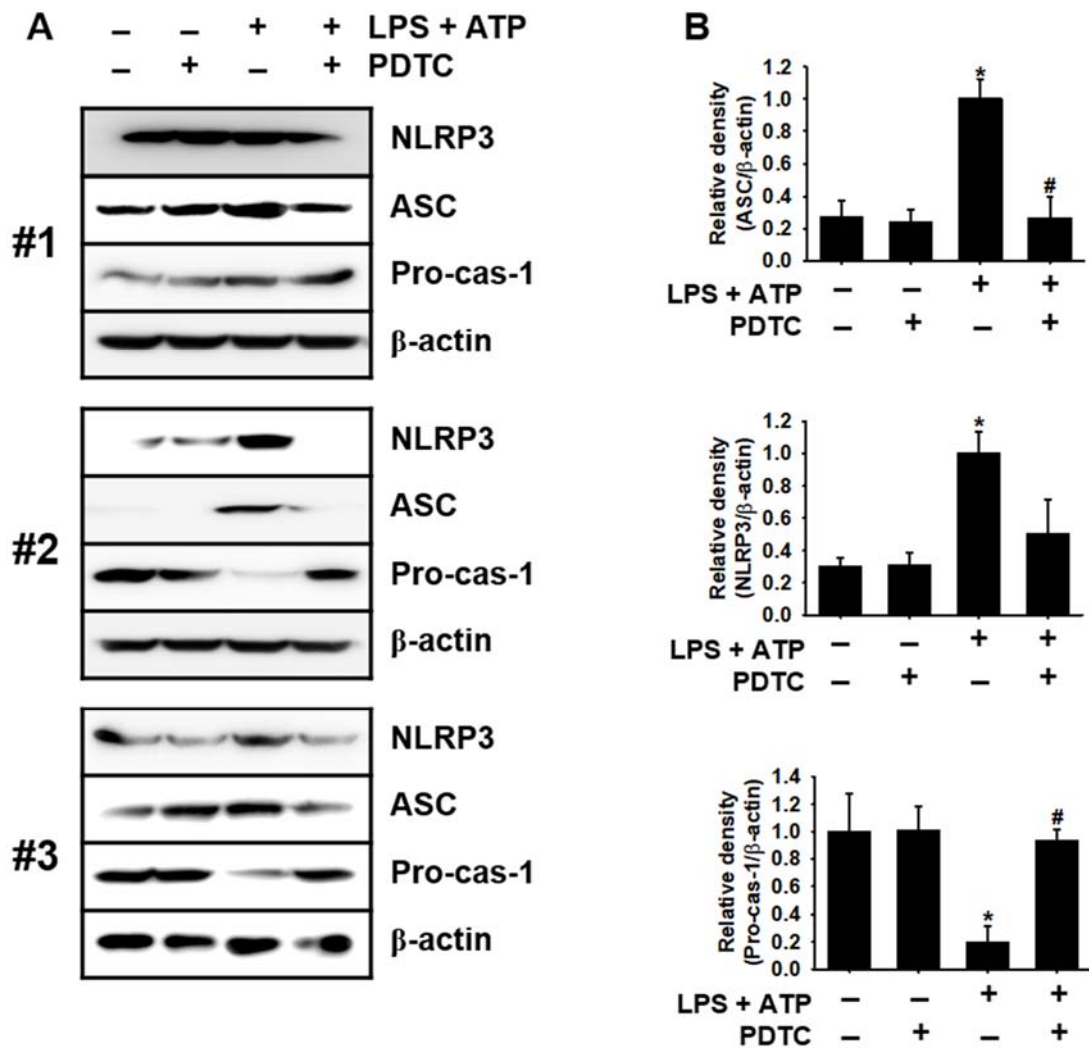

Supplementary Figure S10: Triplicate data (A) and densitometric analysis (B) of Figure 8D.
